# Supplementary material
Source: MDPI journal article supplement (https://www.mdpi.com/2073-4441/11/8/1582)

diatoms chlorophyll a [mg/m<sup>3</sup>]

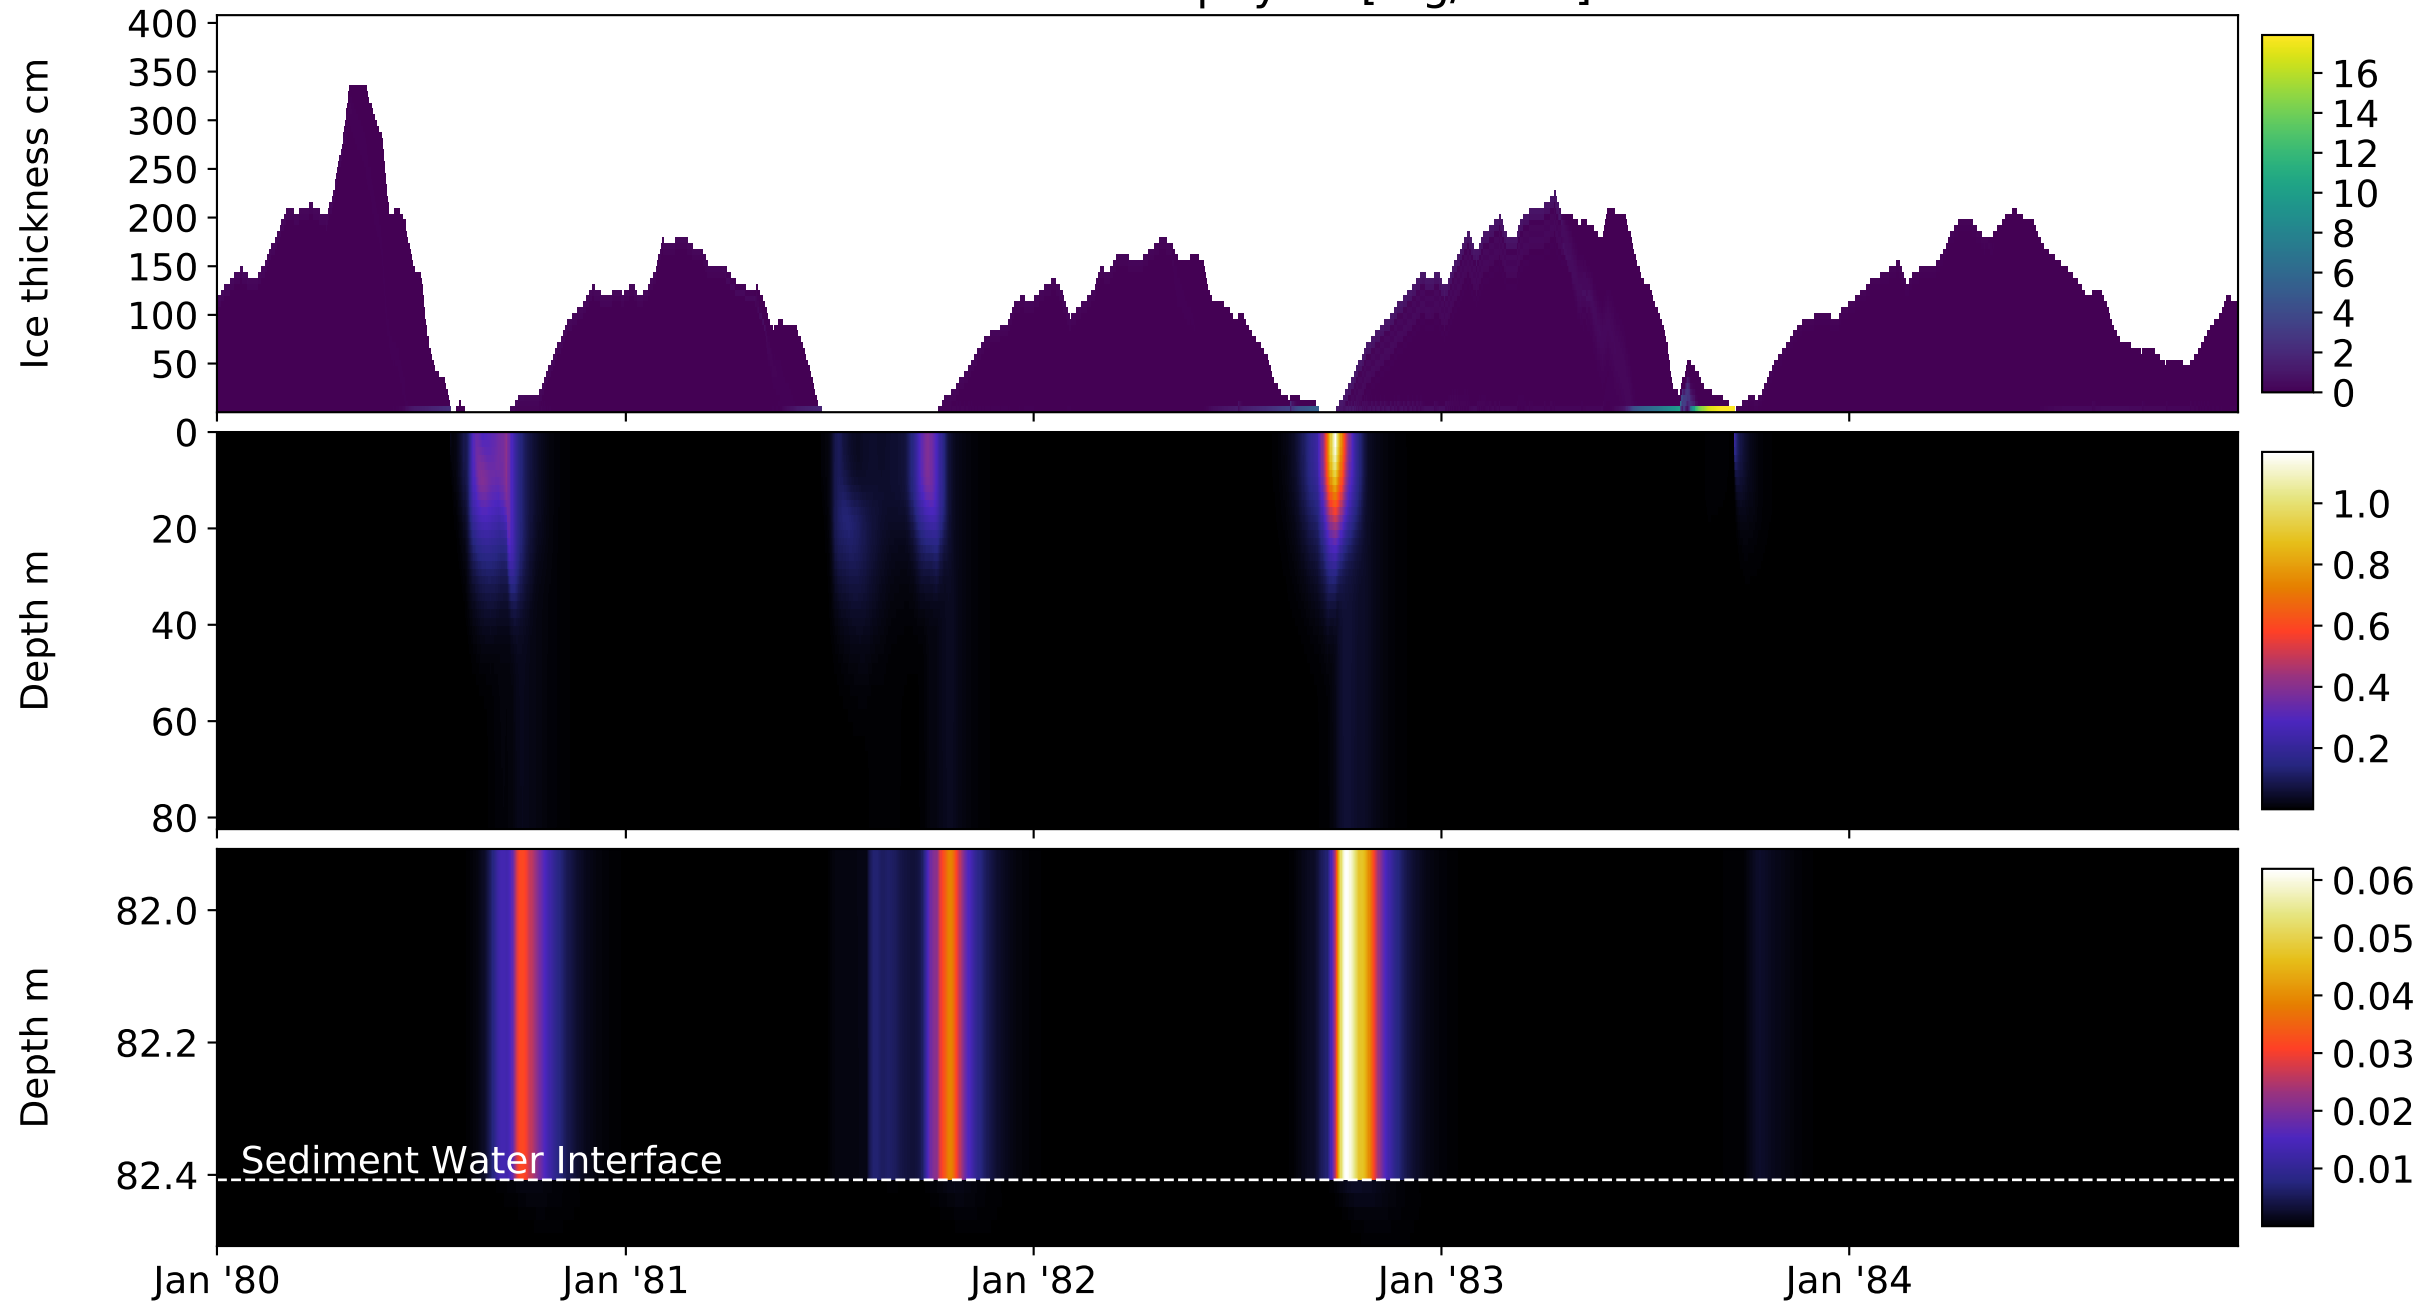

Supplement: s1 [file s1]

picophytoplankton chlorophyll a [mg/m<sup>3</sup>]

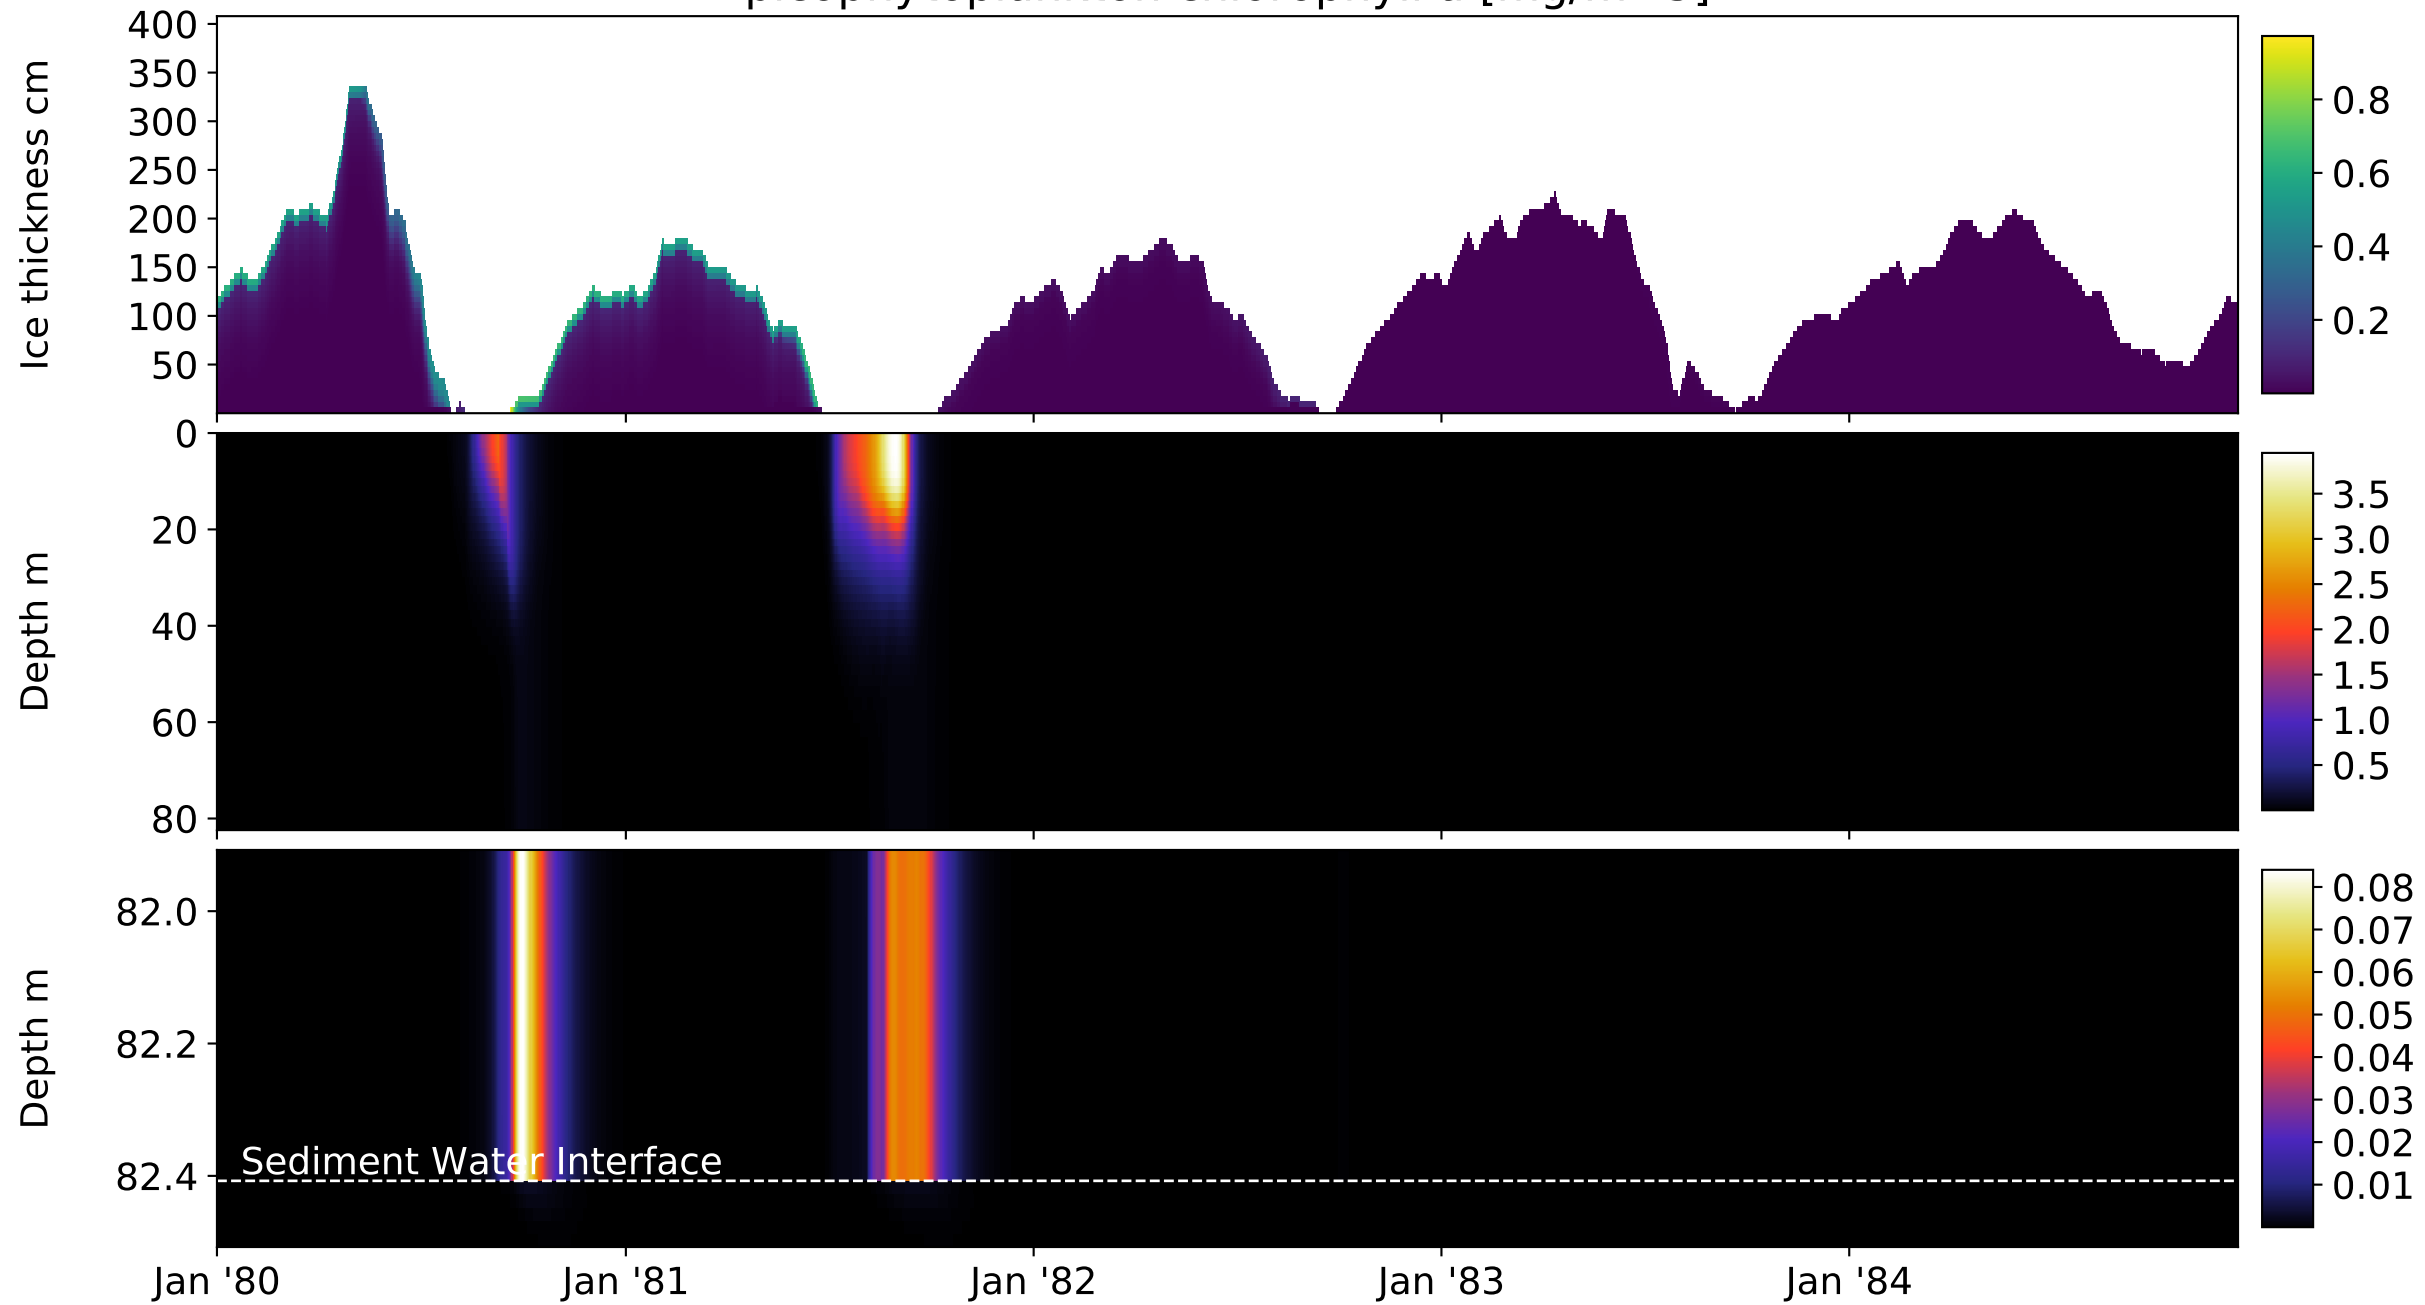

Supplement: s1 [file s1]

pH pH [-]

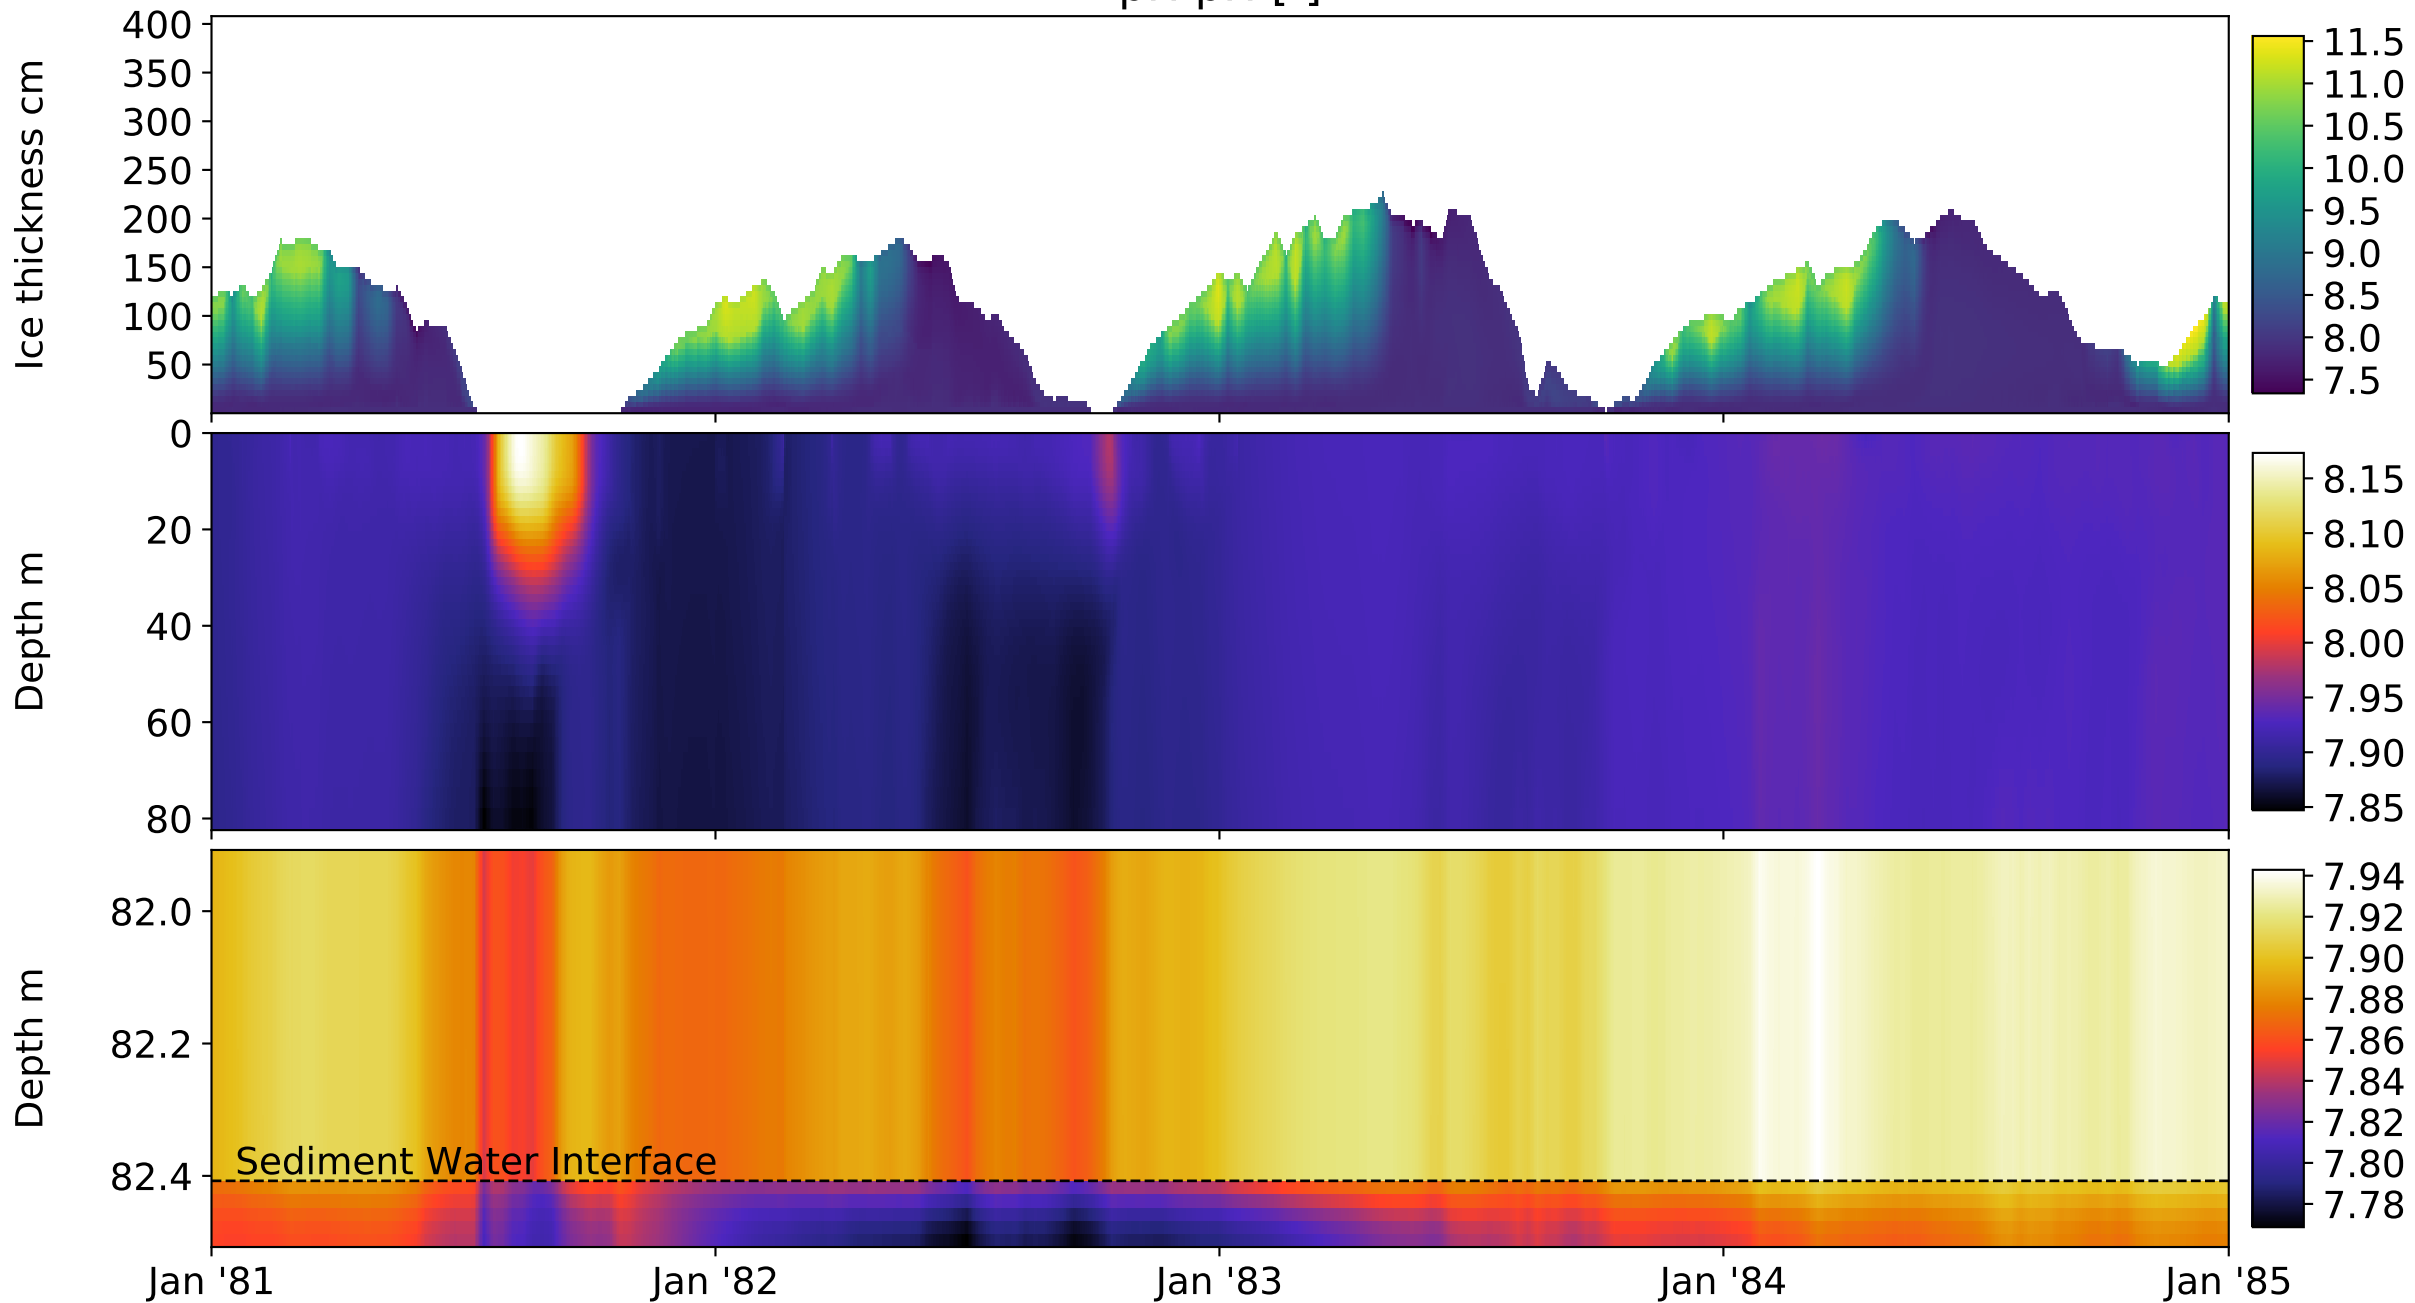

Supplement: s1 [file s1]

nanophytoplankton chlorophyll a [mg/m<sup>3</sup>]

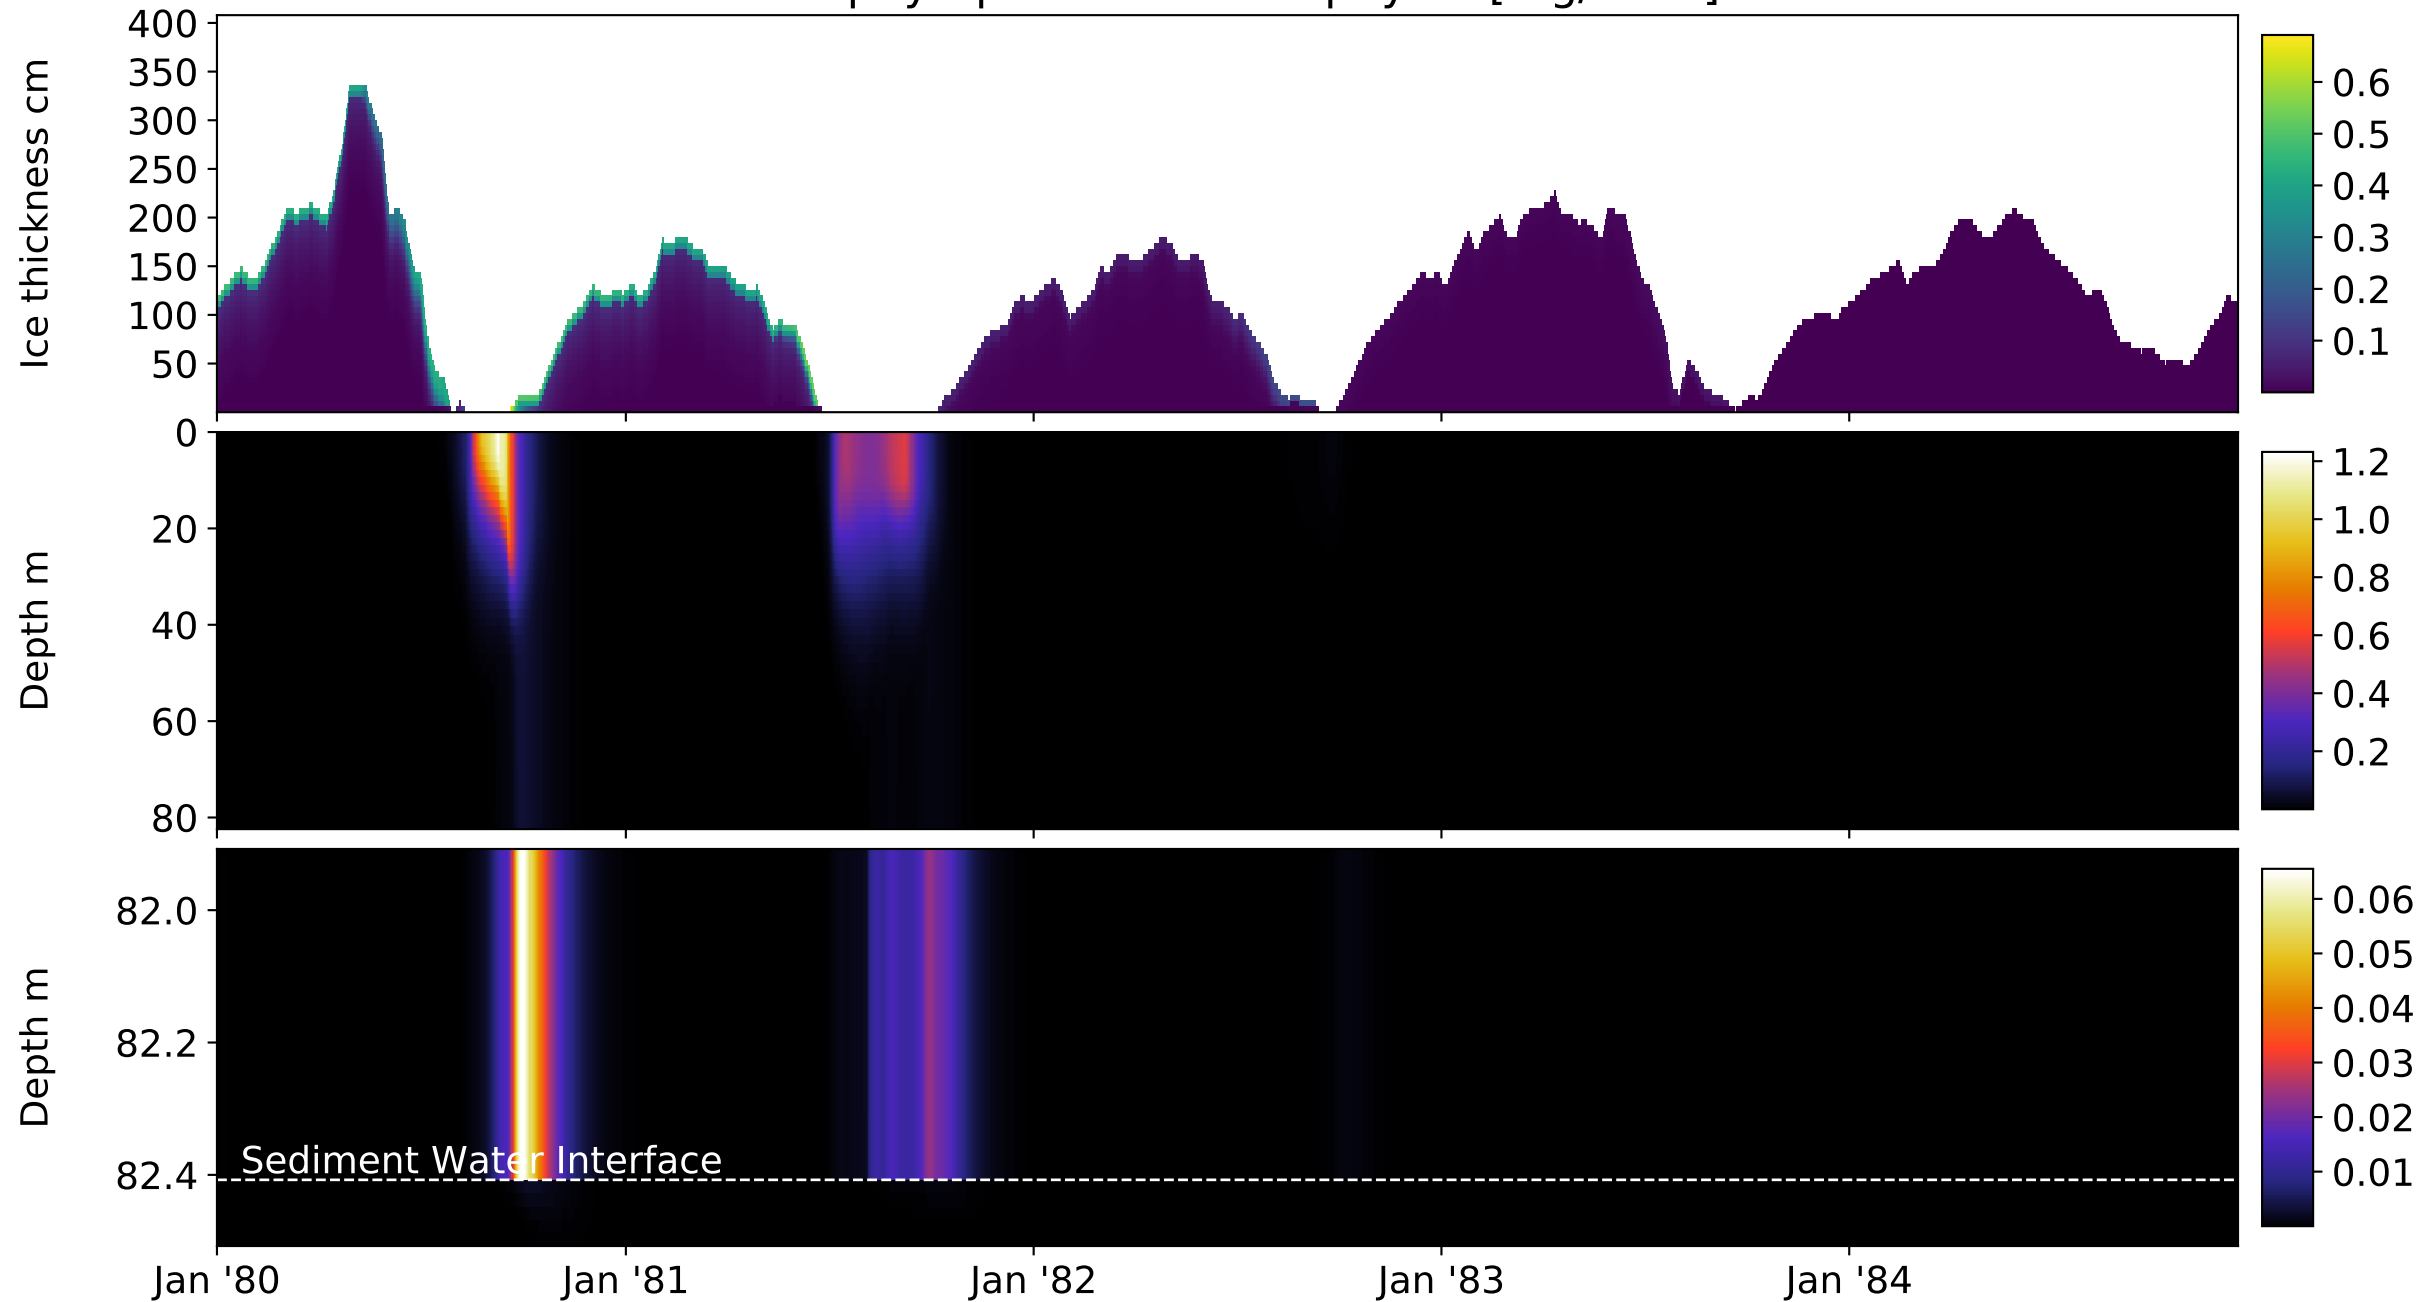

Supplement: s1 [file s1]

bio Phy [mmol/m\*\*3]

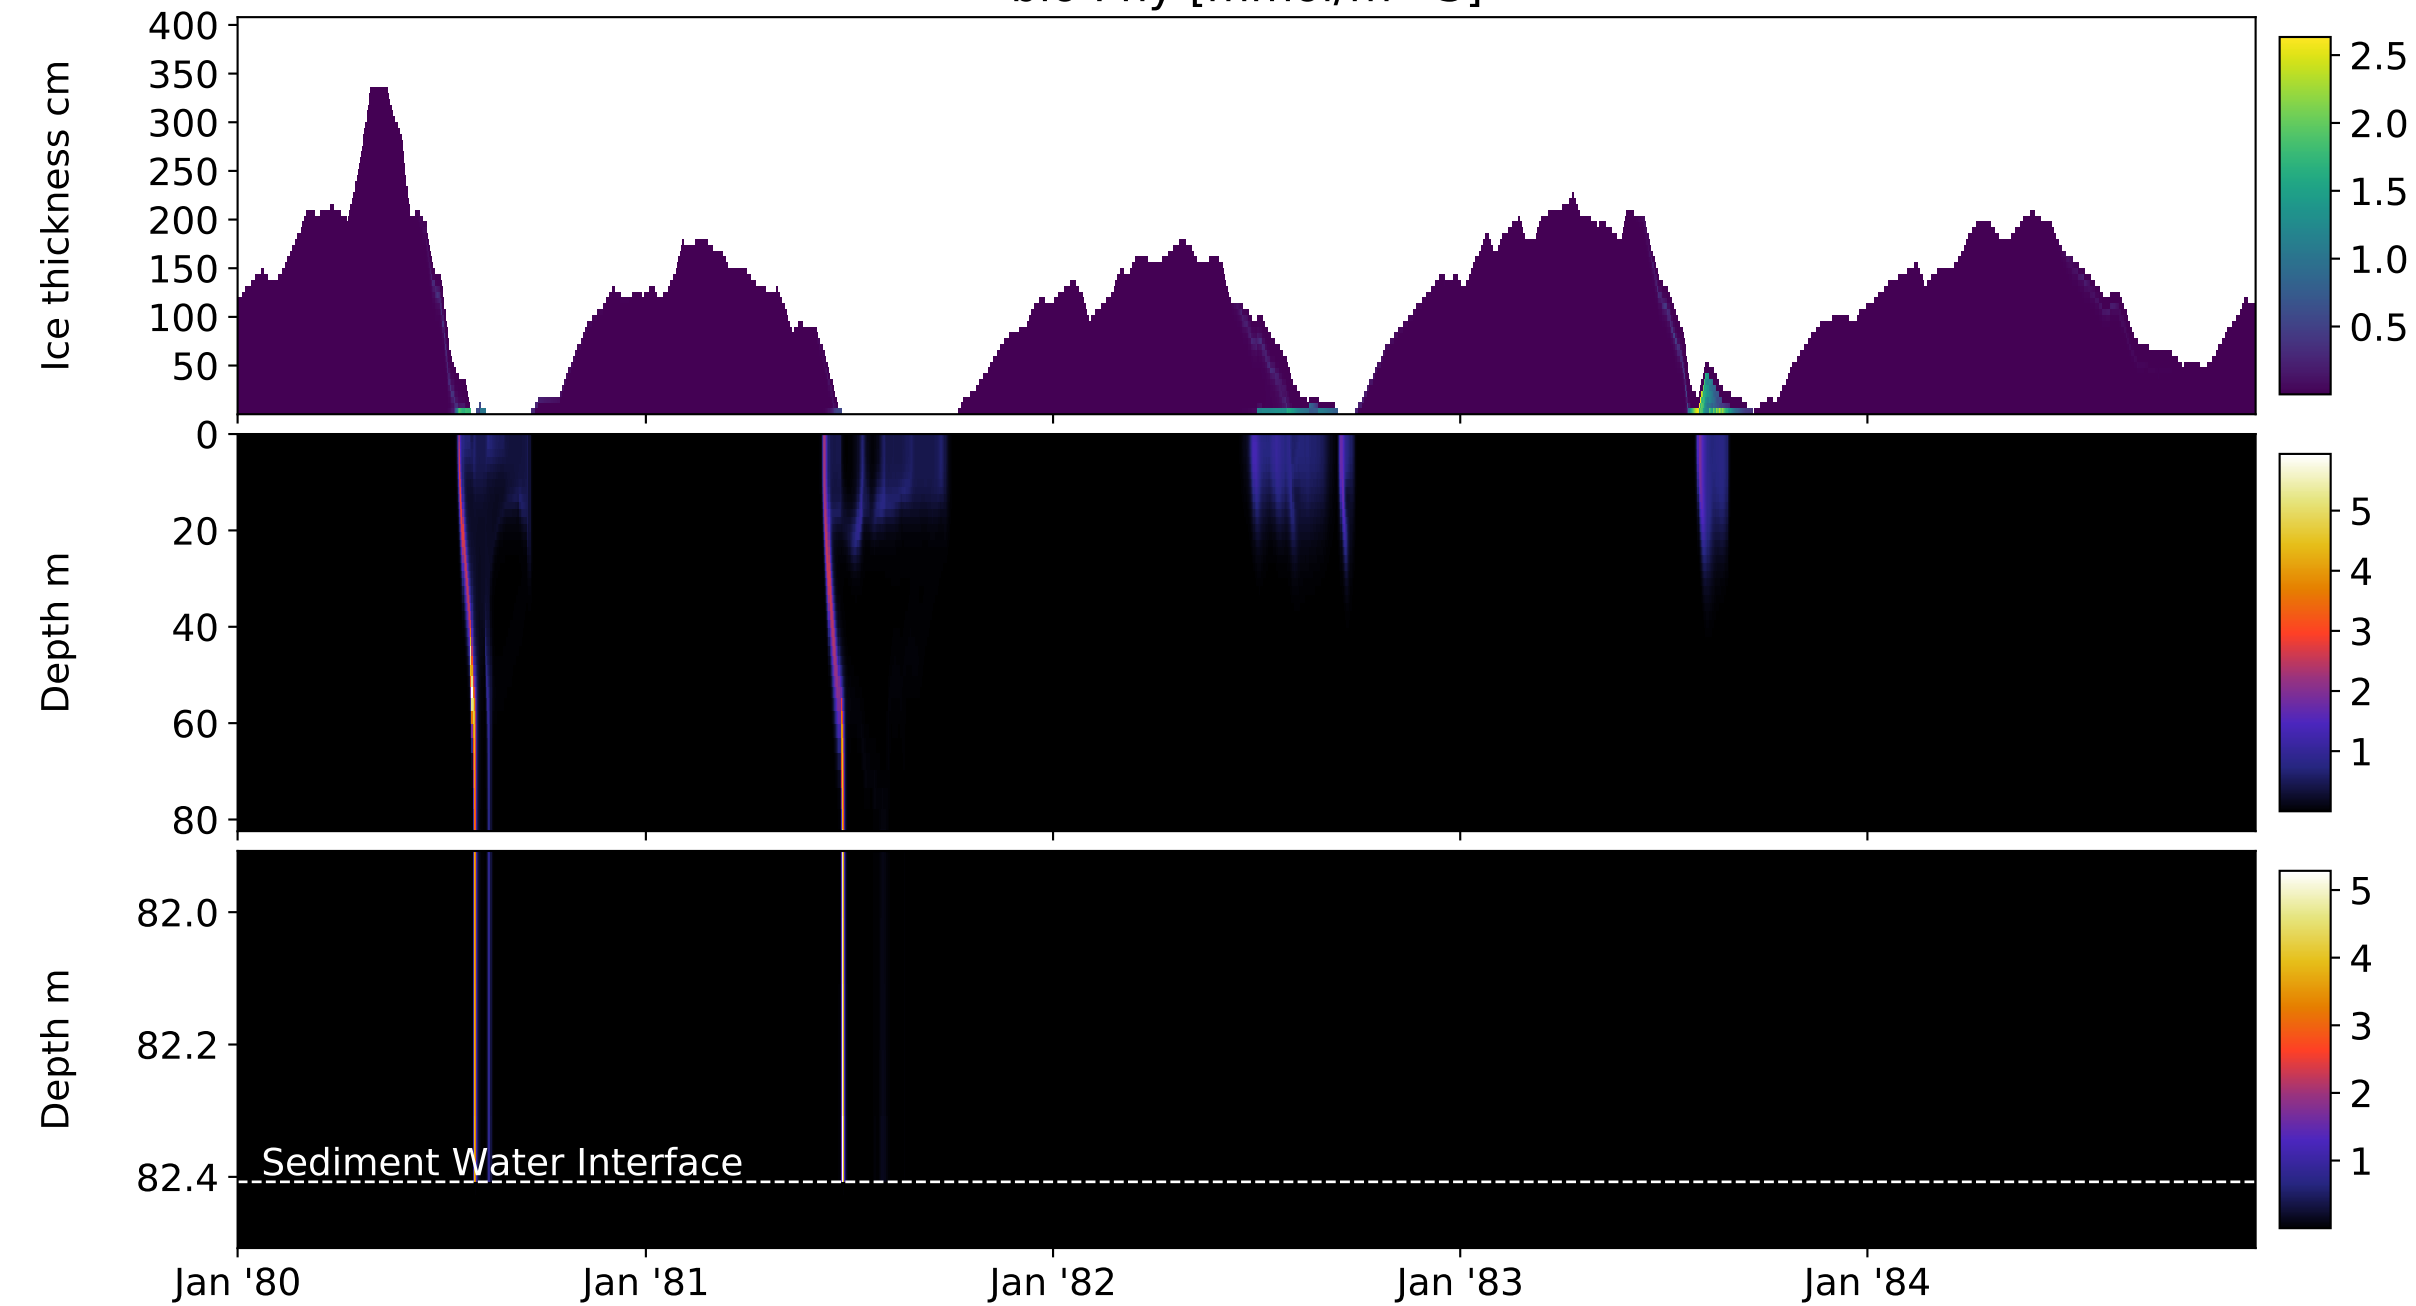

Supplement: s1 [file s1]

B\_N\_Denitr1 mmol/(m\*\*3 day) N

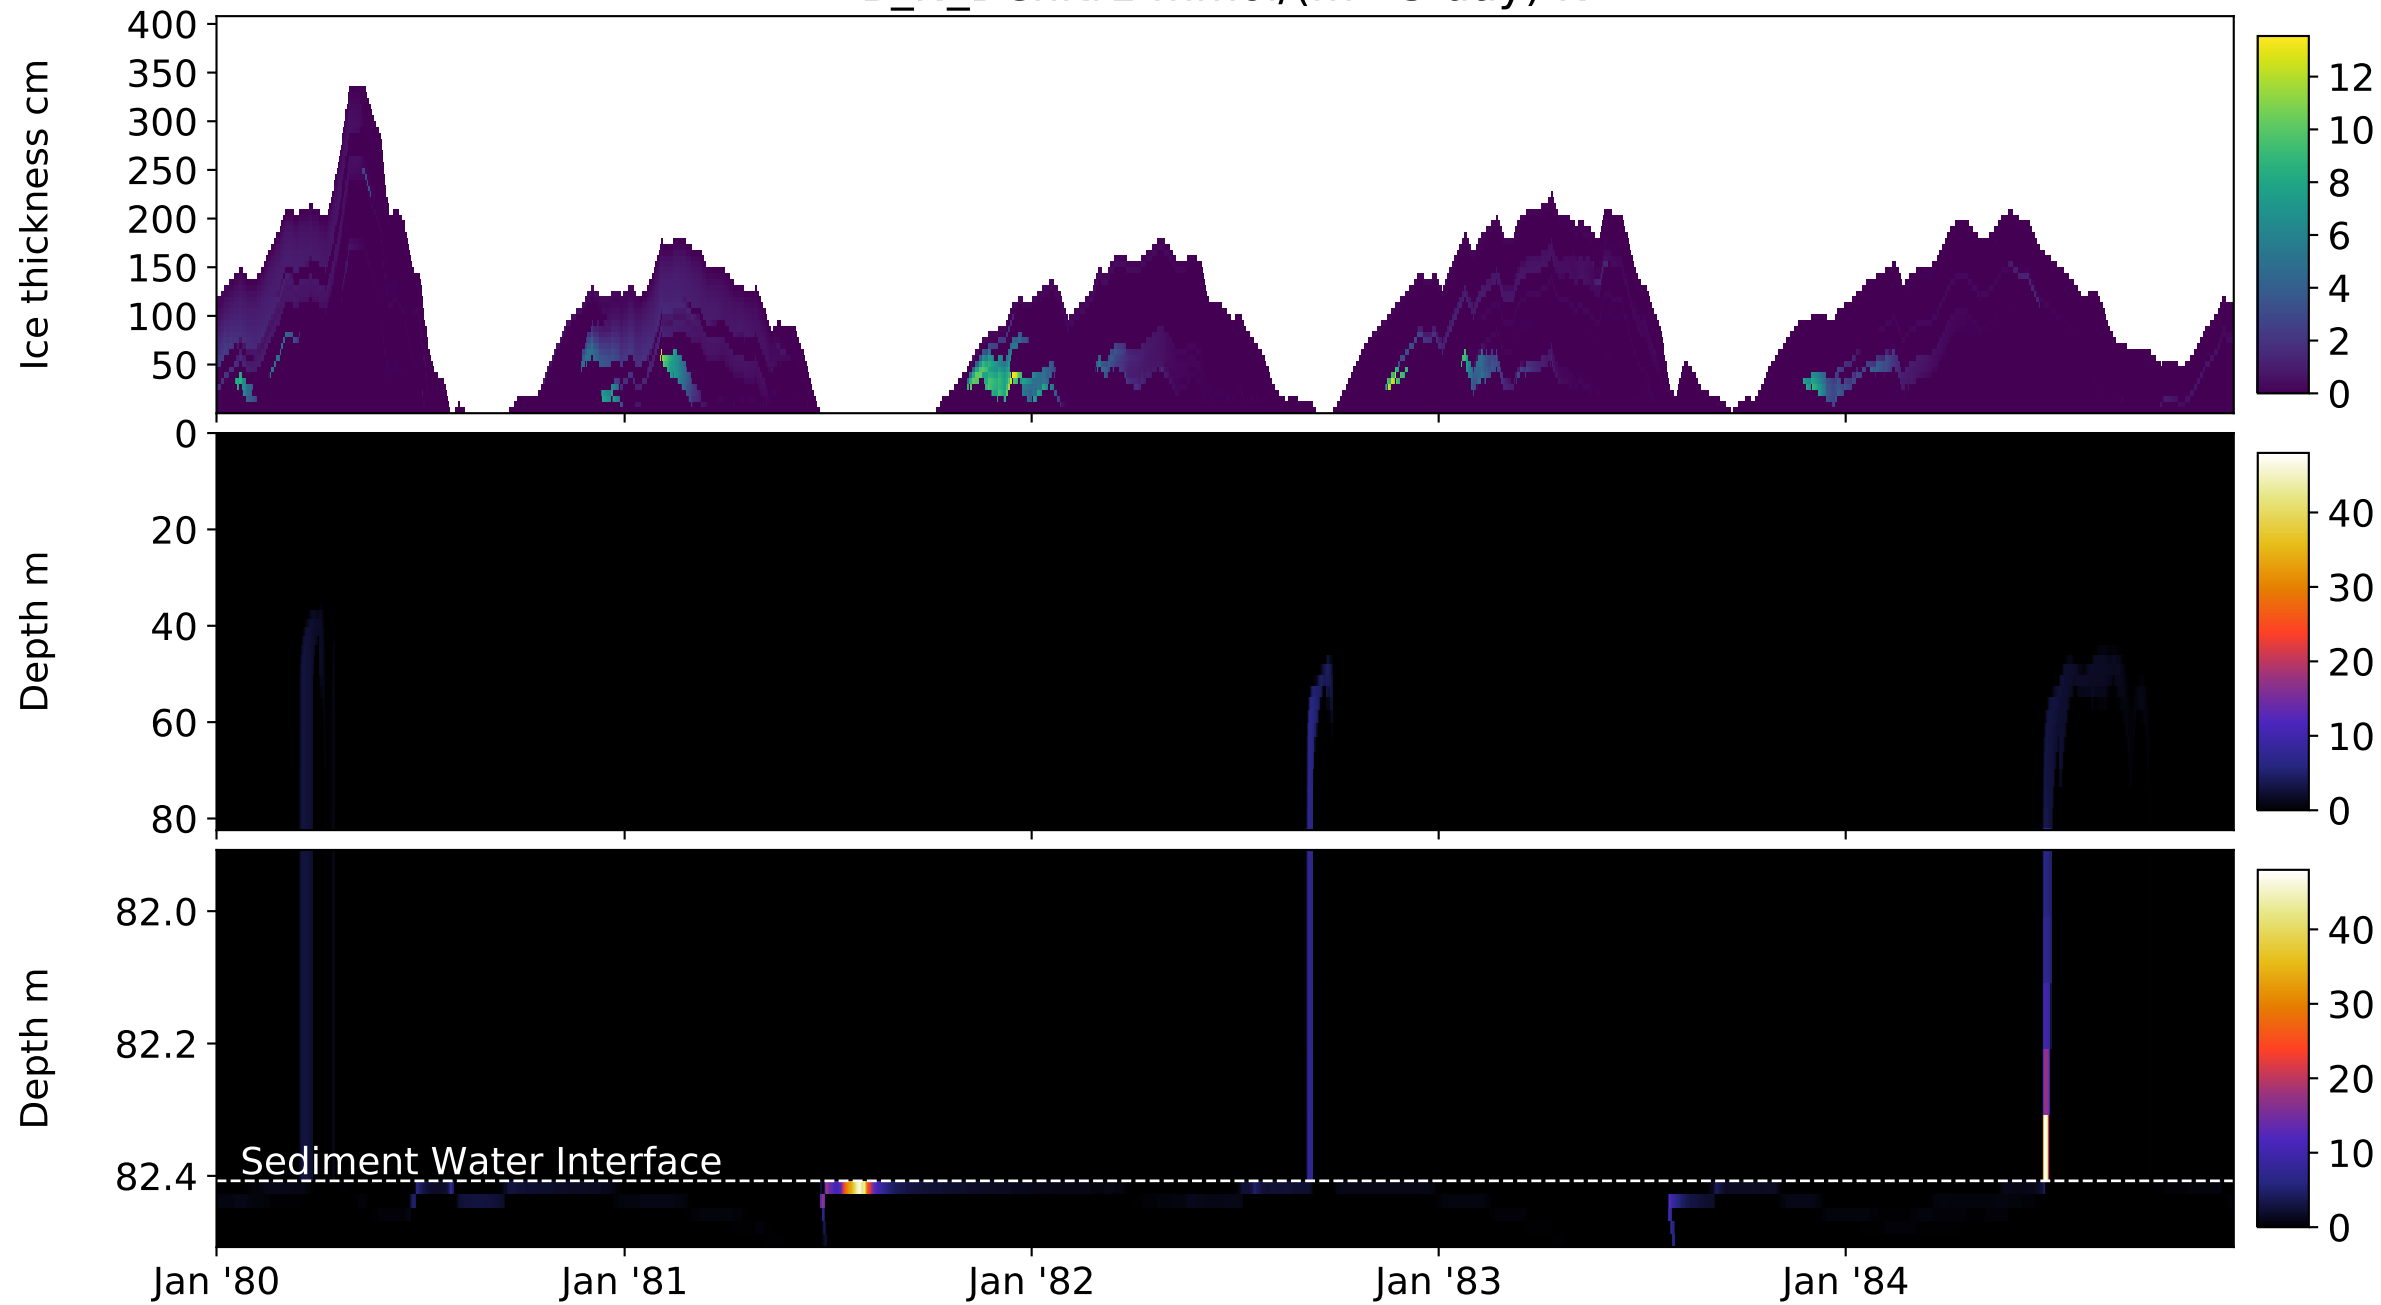

Supplement: s1 [file s1]

B\_N\_Denitr2 mmol/(m\*\*3 day) N

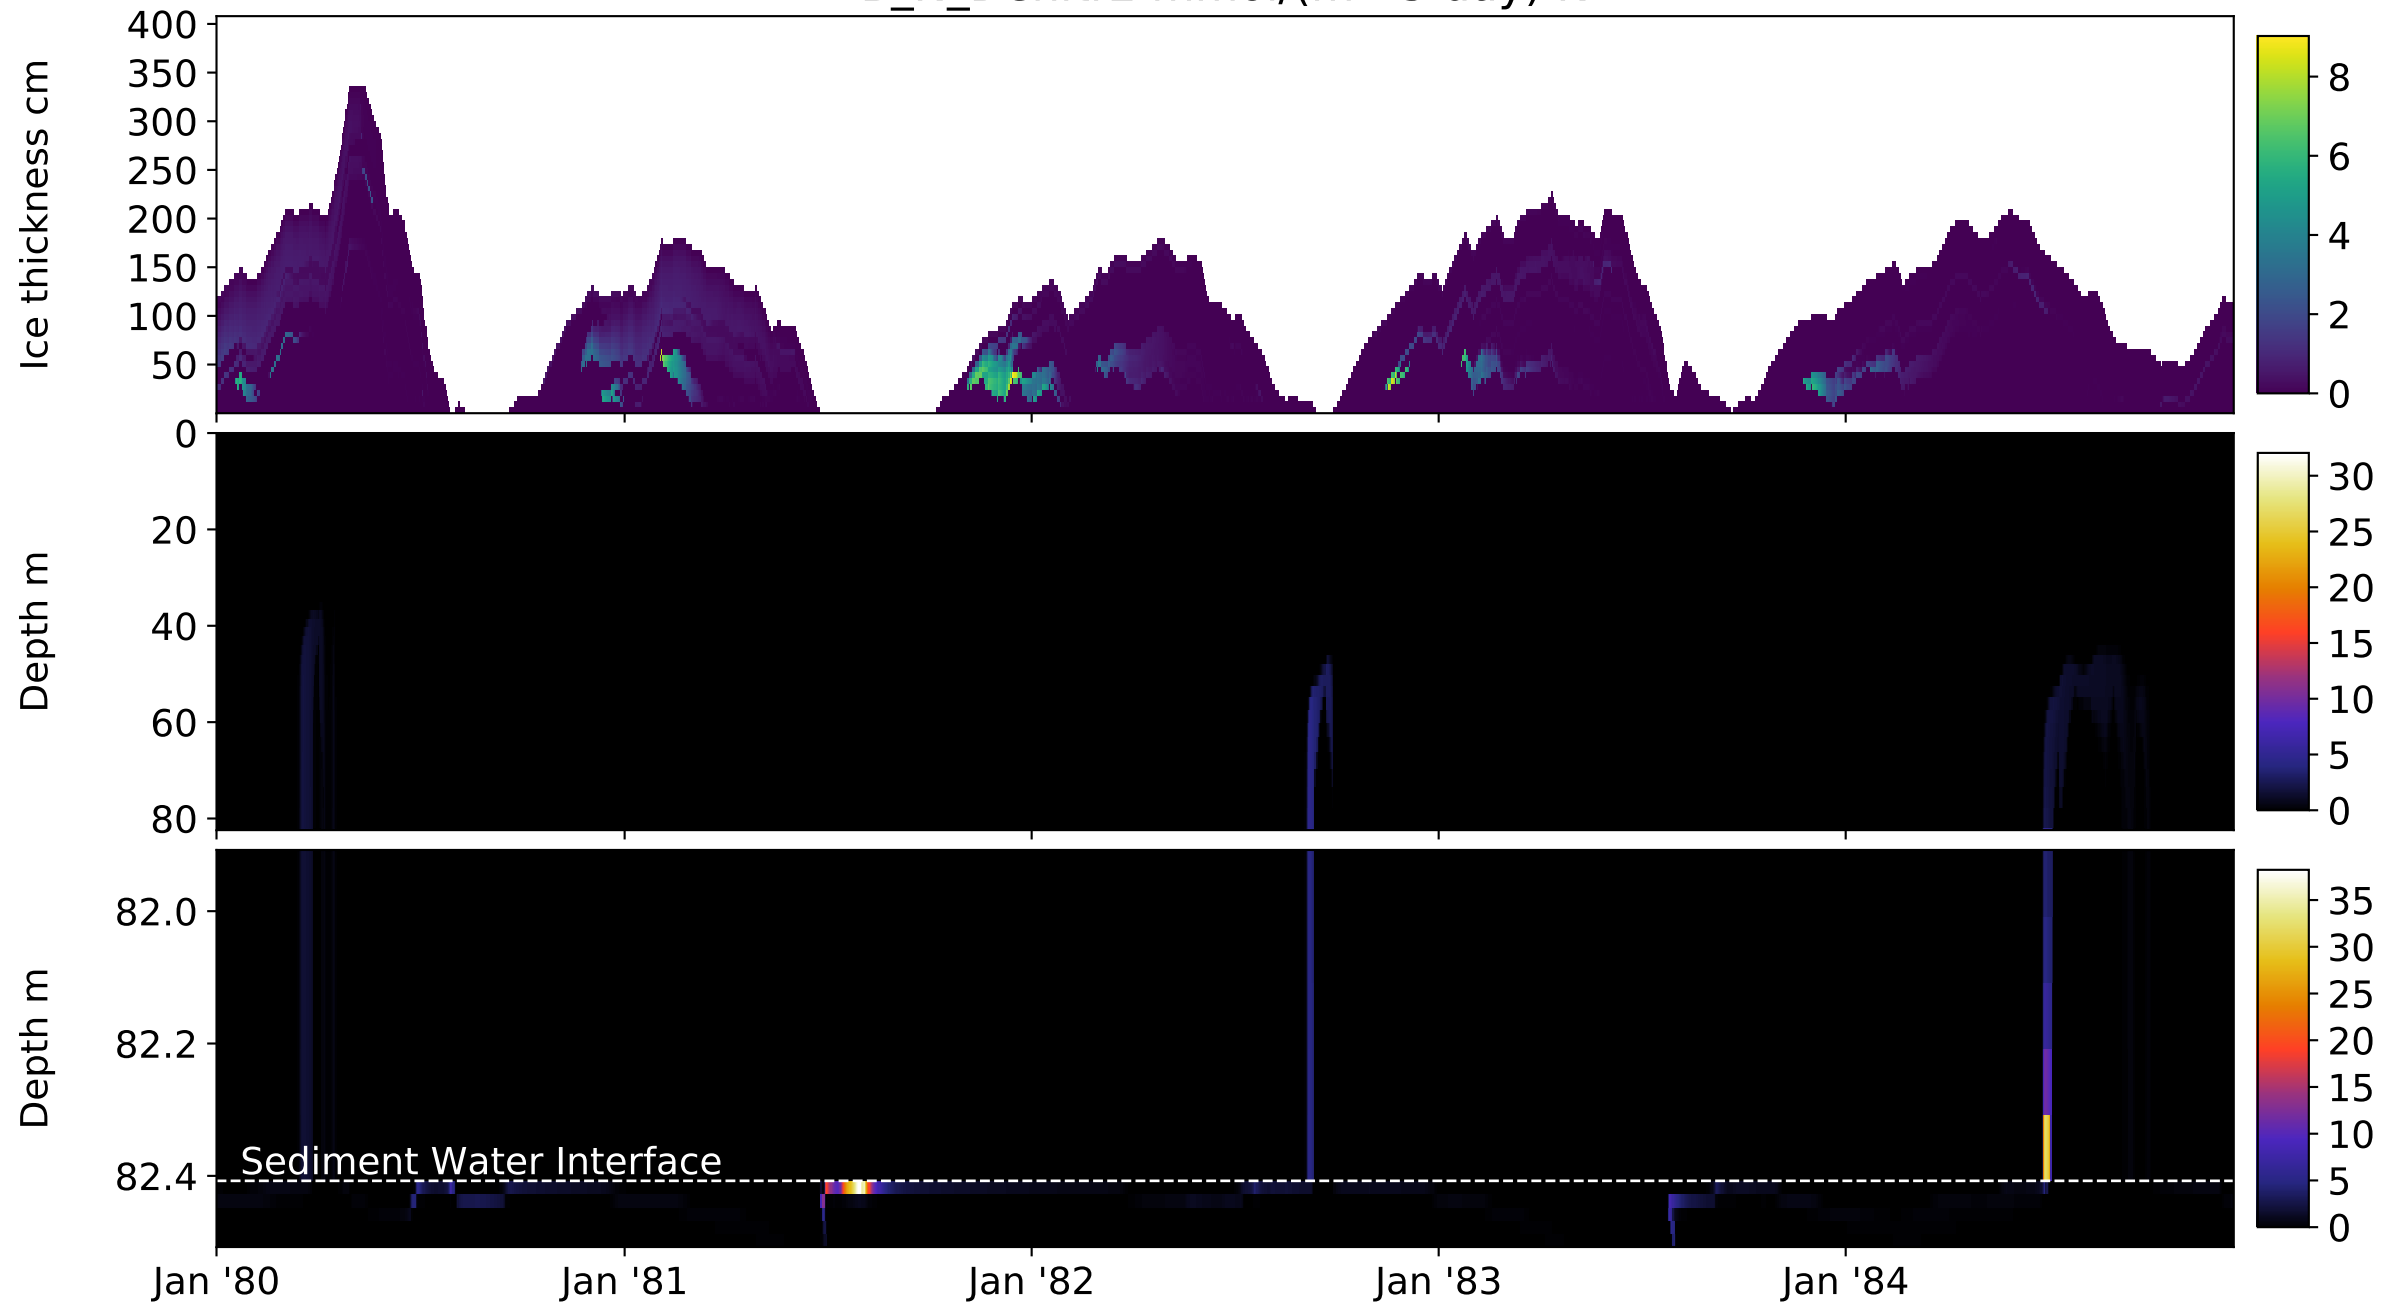

Supplement: s1 [file s1]

B\_N\_Anammox  $\text{mmol}/(\text{m}^3 \text{ day}) \text{ N}$

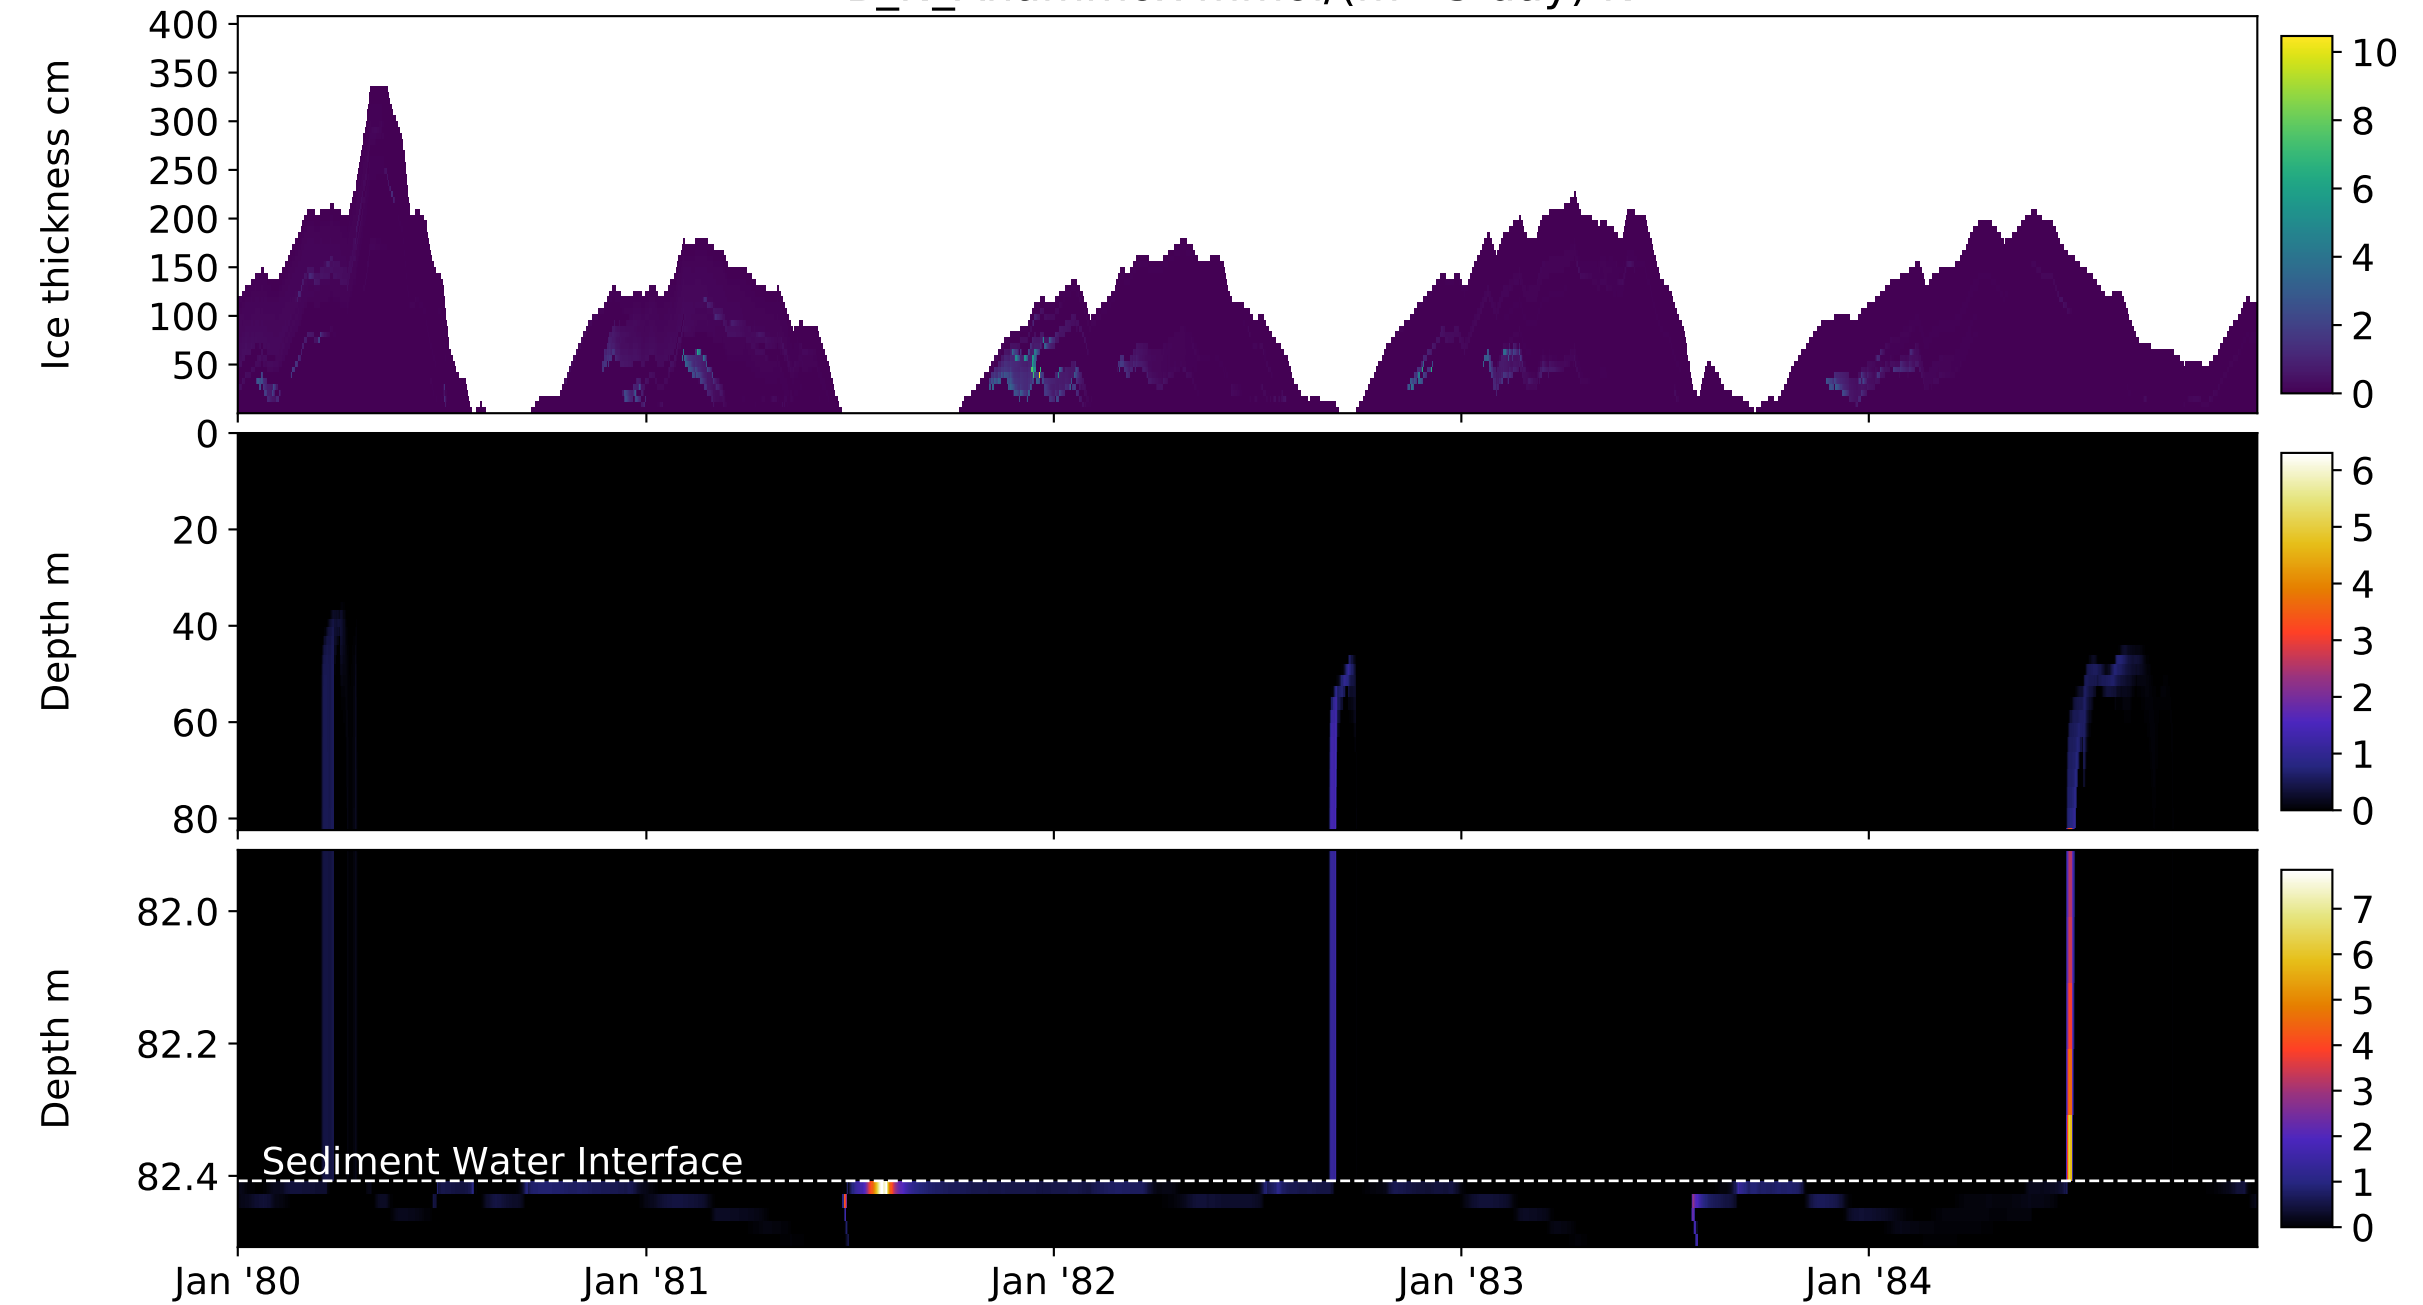

Supplement: s1 [file s1]

microphytoplankton chlorophyll a [mg/m<sup>3</sup>]

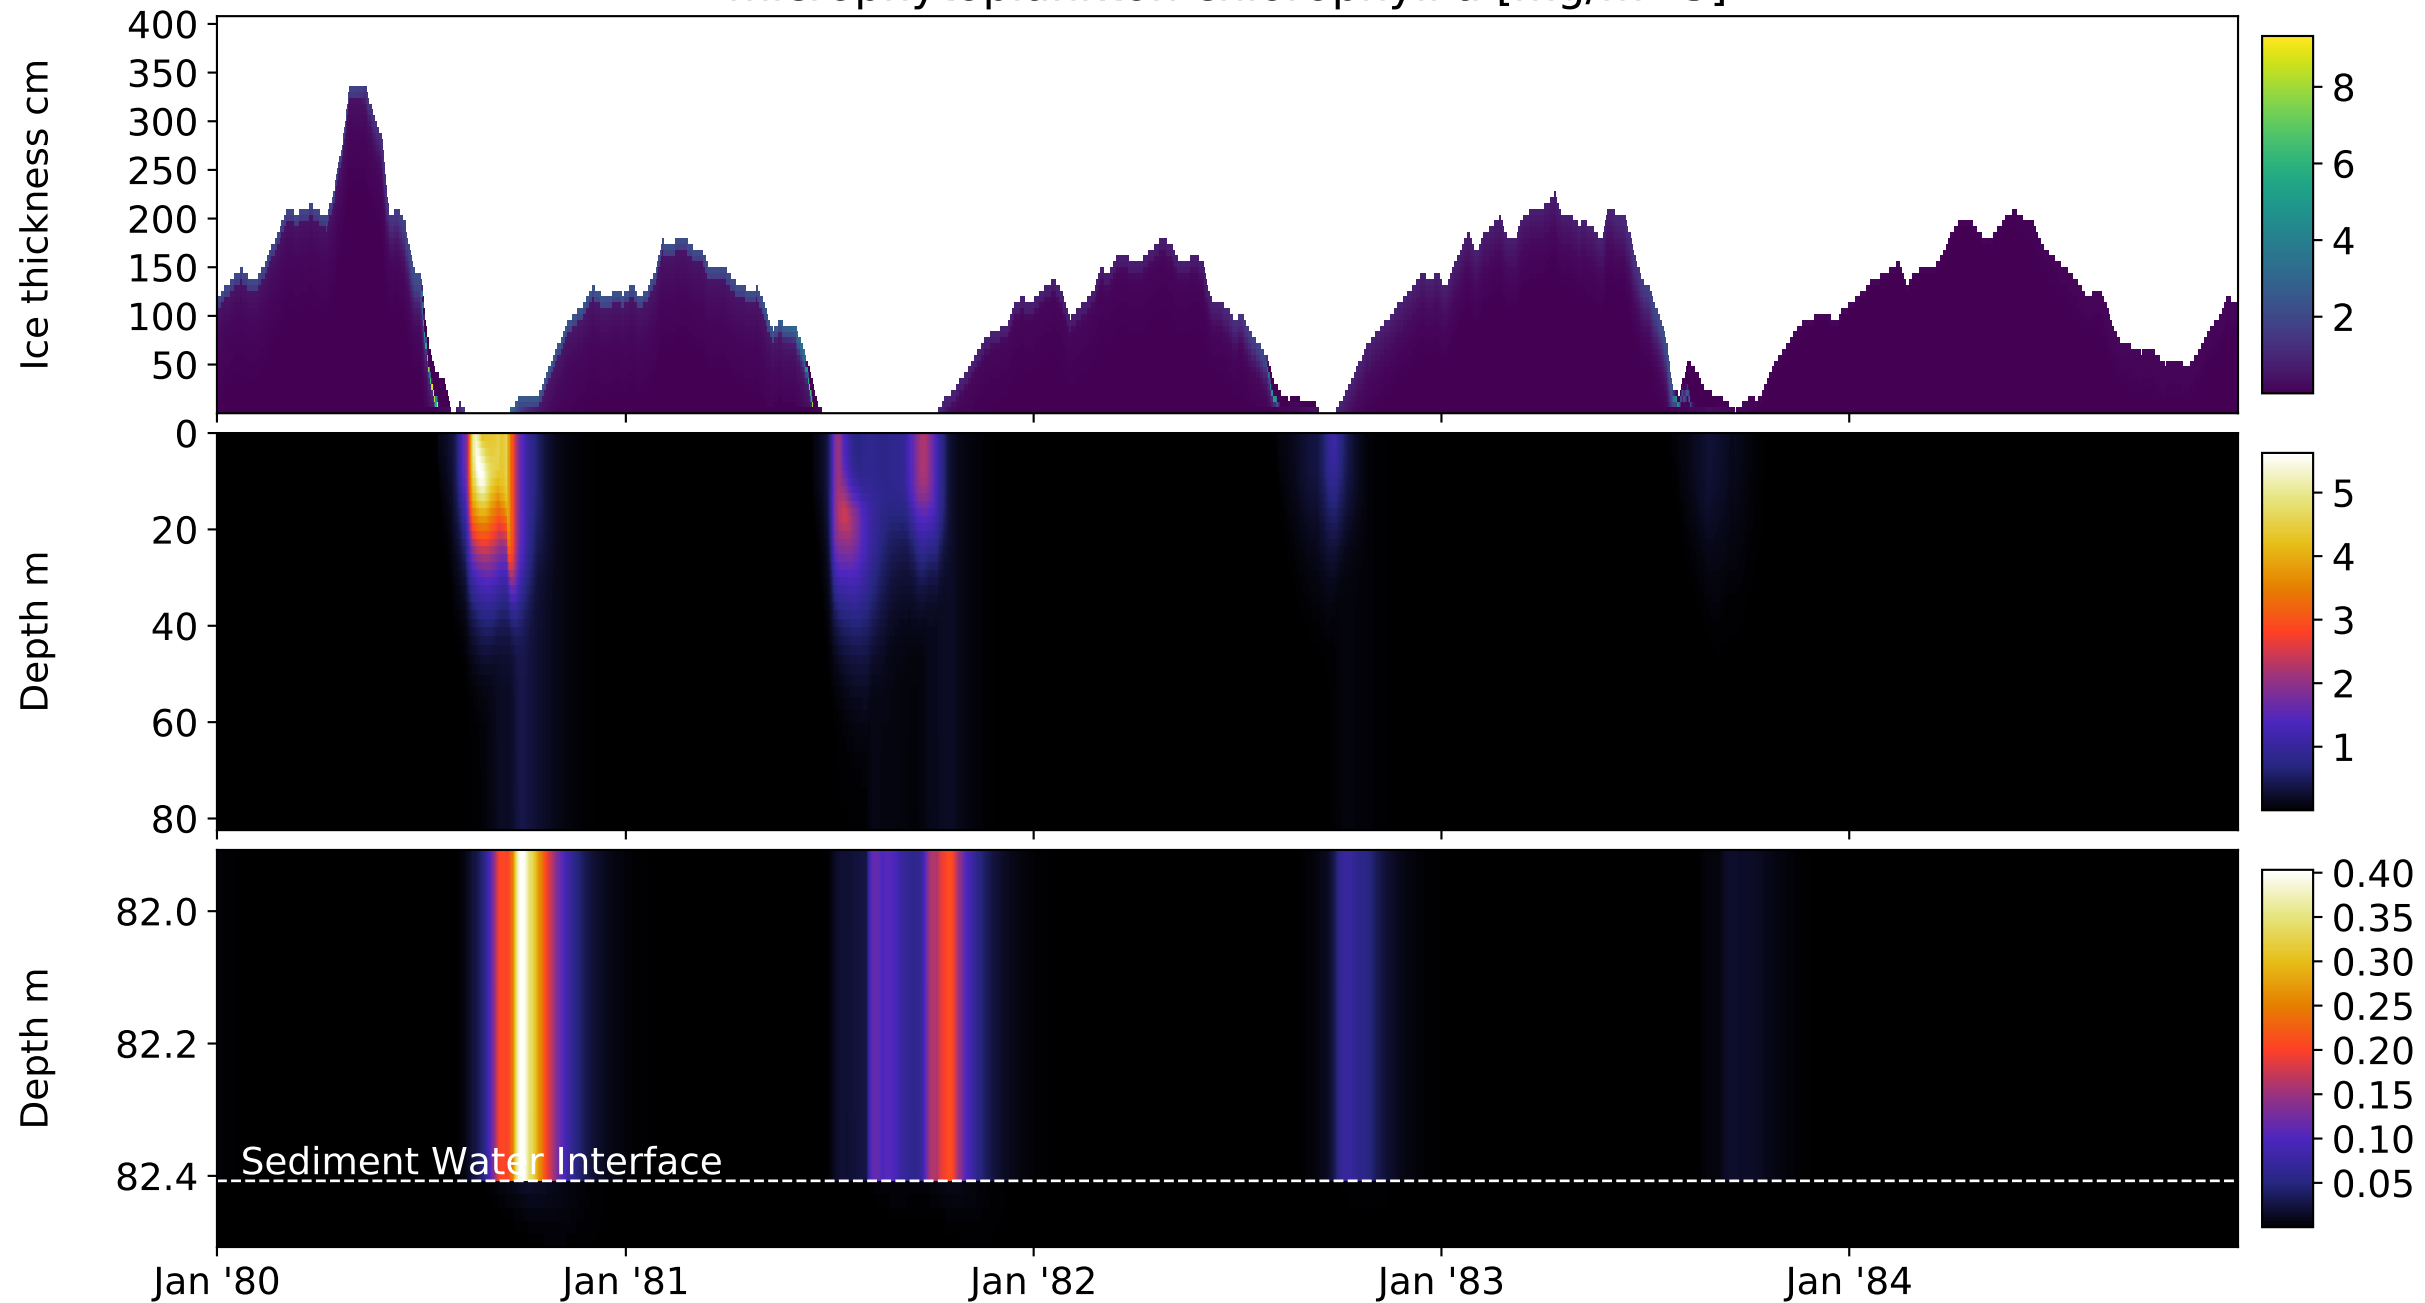

Supplement: s1 [file s1]

diatoms\_ice chlorophyll a [mg/m<sup>3</sup>]

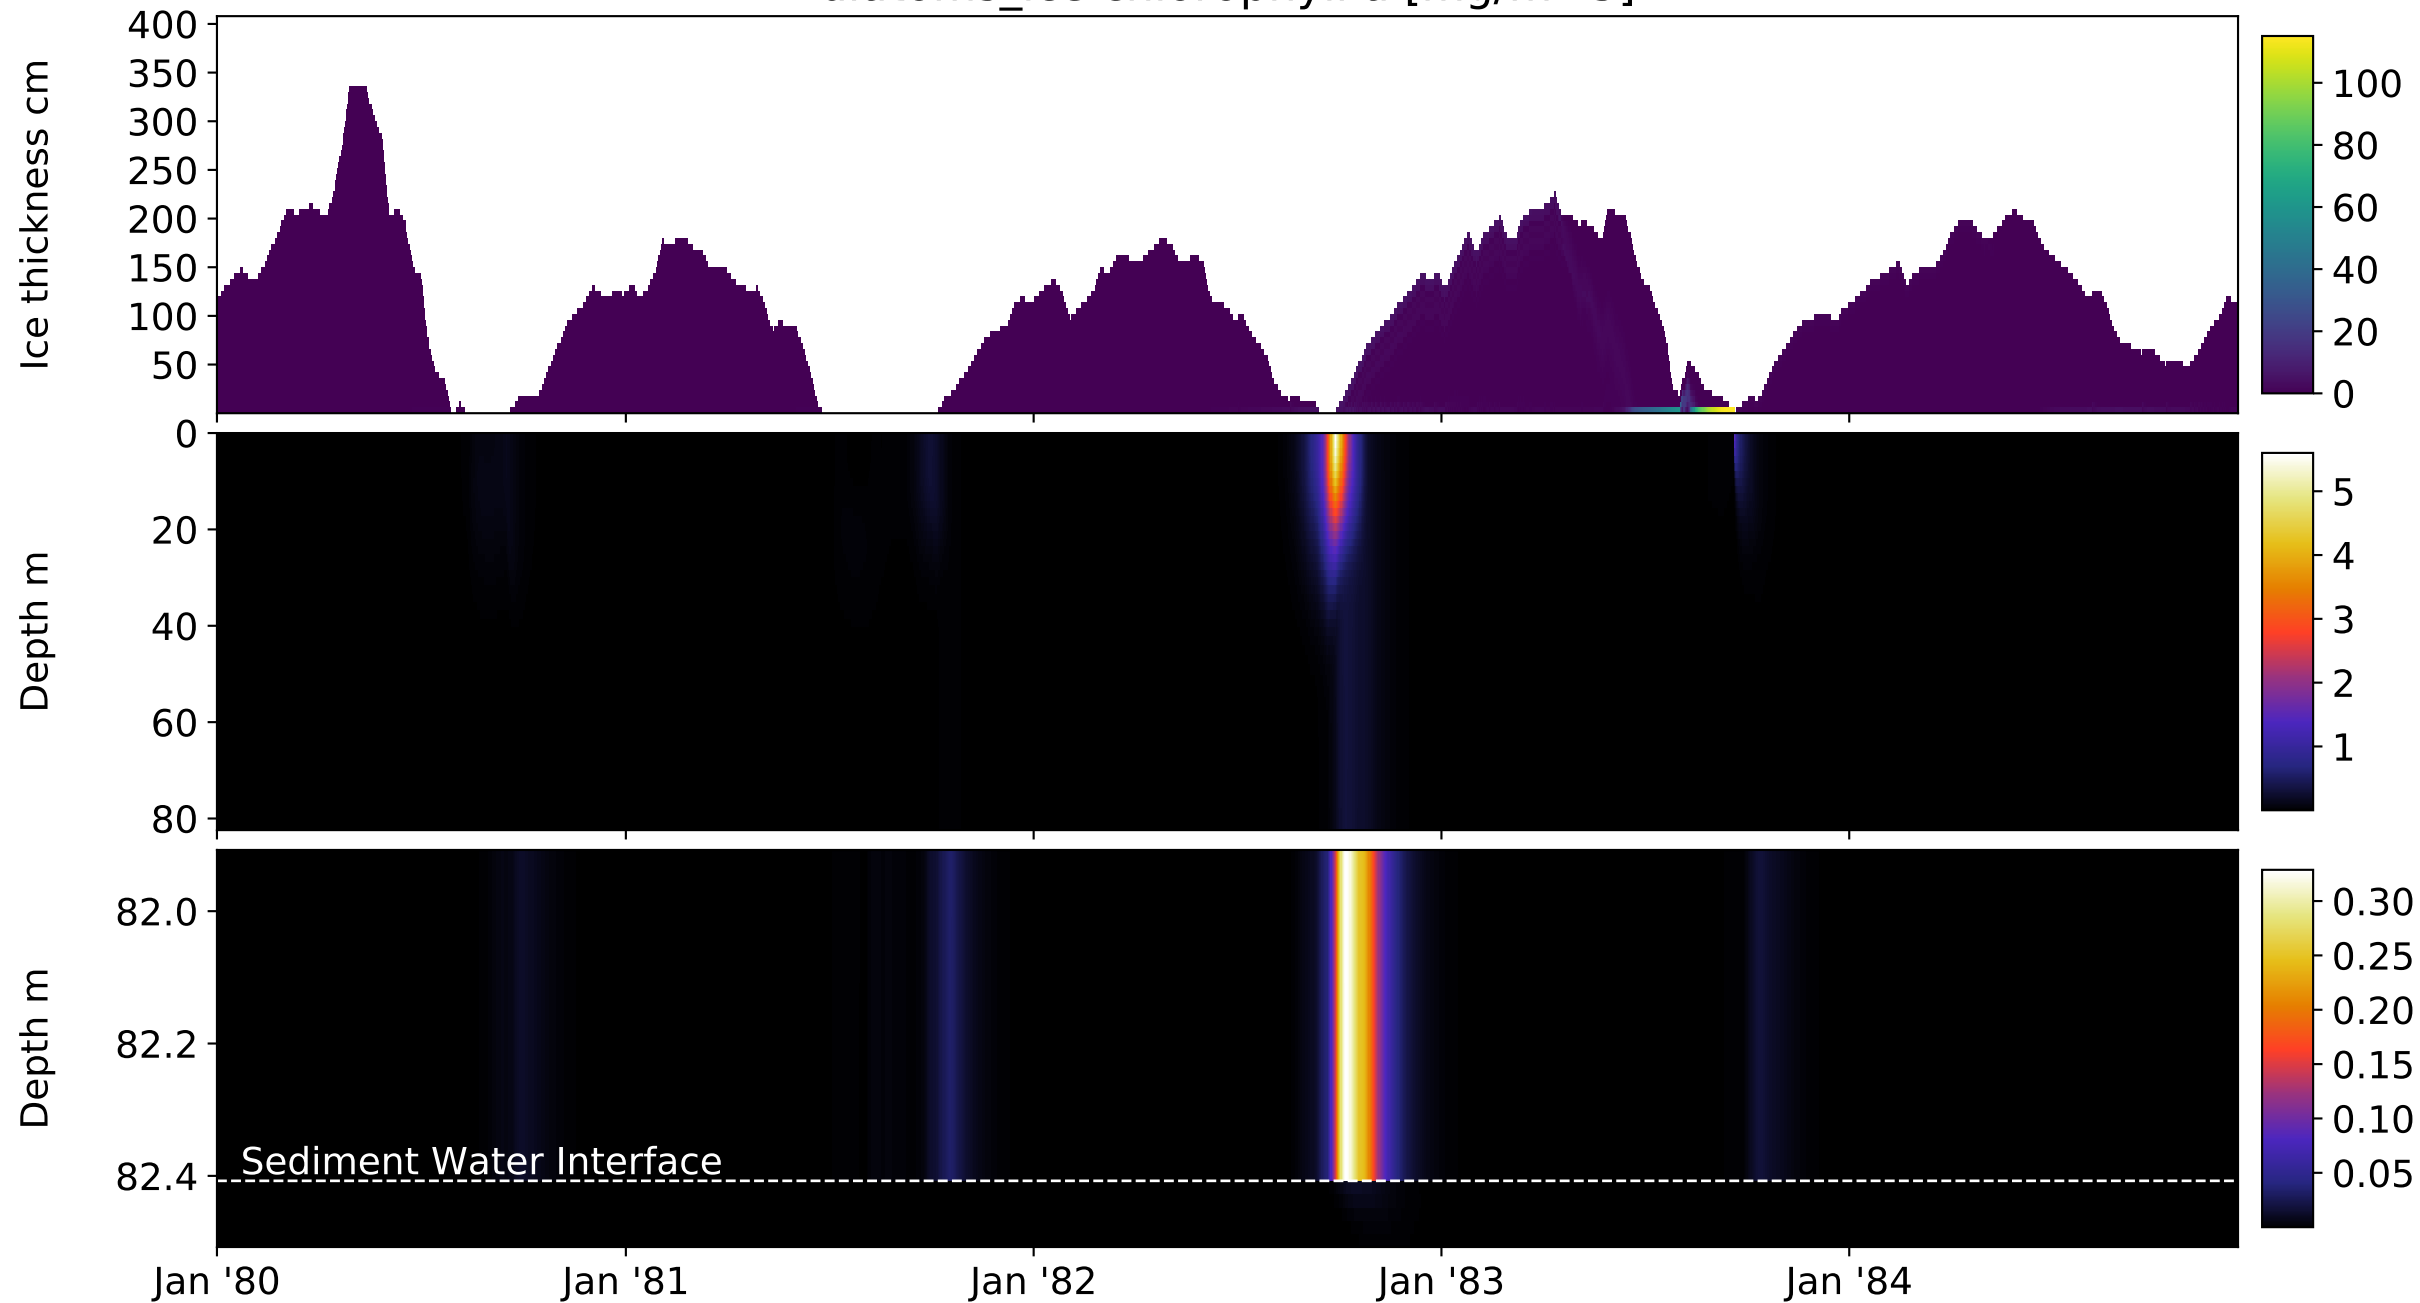

Supplement: s1 [file s1]
